# Supplementary material
Source: publisher site journal article supplement (https://www.dovepress.com/get_supplementary_file.php?f=248377.docx)
Supplement: Supplementary file 1 [file get_supplementary_file.php]

**Supplementary Table 1.** Acquisition of history of medical conditions, allergies and medication use

| **Data element** | **Source** | **Number of participants with information collected, n (%)** | |
| --- | --- | --- | --- |
| **Baseline (n=25)** | **Follow-up (n=24)** |
| Medical History | Community-based home care provider | 24 (96.0) | 23 (95.8) |
| General practitioner | 24 (96.0) | 20 (83.3) |
| Participant/caregiver | 24 (96.0) | 24 (100.0) |
| Medication History | Community-based home care provider | 2 (8.0) | 0 (0.0) |
| General practitioner | 24 (96.0) | 21 (87.5) |
| Pharmacy | 23 (92.0) | 21 (87.5) |
| Participant/caregiver | 22 (88.0) | 24 (100.0) |
| Allergy Status | Community-based home care provider | 13 (52.0) | 14 (58.3) |
| General practitioner | 19 (76.0) | 21 (87.5) |
| Participant/caregiver | 25 (100.0) | 24 (100.0) |

**Supplementary Table 2.** Questionnaire completion rates

| **Questionnaires** | **Baseline (n=25)** | | **Follow-up (n=24)** | |
| --- | --- | --- | --- | --- |
| **Participants who were able to self-report, n (%)** | **Assessment completion rates by research nurses, n (%)** | **Participants who were able to self-report, n (%)** | **Assessment completion rates by research nurses, n (%)** |
| Self-Efficacy for Appropriate Medication use Scale (SEAMS) | 22 (91.7) | 23 (95.8) | 23 (95.8) | 23 (95.8) |
| FRAIL scale | 22 (91.7) | 19 (79.2) | 23 (95.8) | 15 (62.5) |
| Quality of Life in Alzheimer’s Disease (QoL-AD) scale | 17 (70.8) | 24 (100.0) | 22 (91.7) | 24 (100.0) |
| Short Assessment of Patient Satisfaction Scale (SAPS) | 23 (95.8) | 23 (95.8) | 22 (91.7) | 22 (91.7) |

**Supplementary Table 3.** Completion rates for informant-only questionnaires

| **Informant-only assessments** | **Baseline** | | **Follow-up** | |
| --- | --- | --- | --- | --- |
| **Informants who were able to participate, n (%)** | **Assessment completion rates by research nurses, n (%)** | **Informants who were able to participate, n (%)** | **Assessment completion rates by research nurses, n (%)** |
| Dementia Severity Rating Scale (DSRS) | 5 (20.8%) | 5 (20.8%) | 2 (8.3%) | 2 (8.3%) |
| Katz Activities of Daily Living scale | 23 (95.8%) | 23 (95.8%) | 24 (100.0%) | 24 (100.0%) |
